# Supplementary material for: Automated UMLS-Based Comparison of Medical Forms
Source: PLOS journal article supplement (doi:10.1371/journal.pone.0067883), 2013-07-04

## **UMLS-based Comparison of Medical Forms**

Results from: 07.02.2013

Number of Forms: 7

Number of Items: 285

Min. Number of Items per form: 5

Max. Number of Items per form: 87

Average Number of Items per form: 41

Domain: Prostate cancer

Identical Items

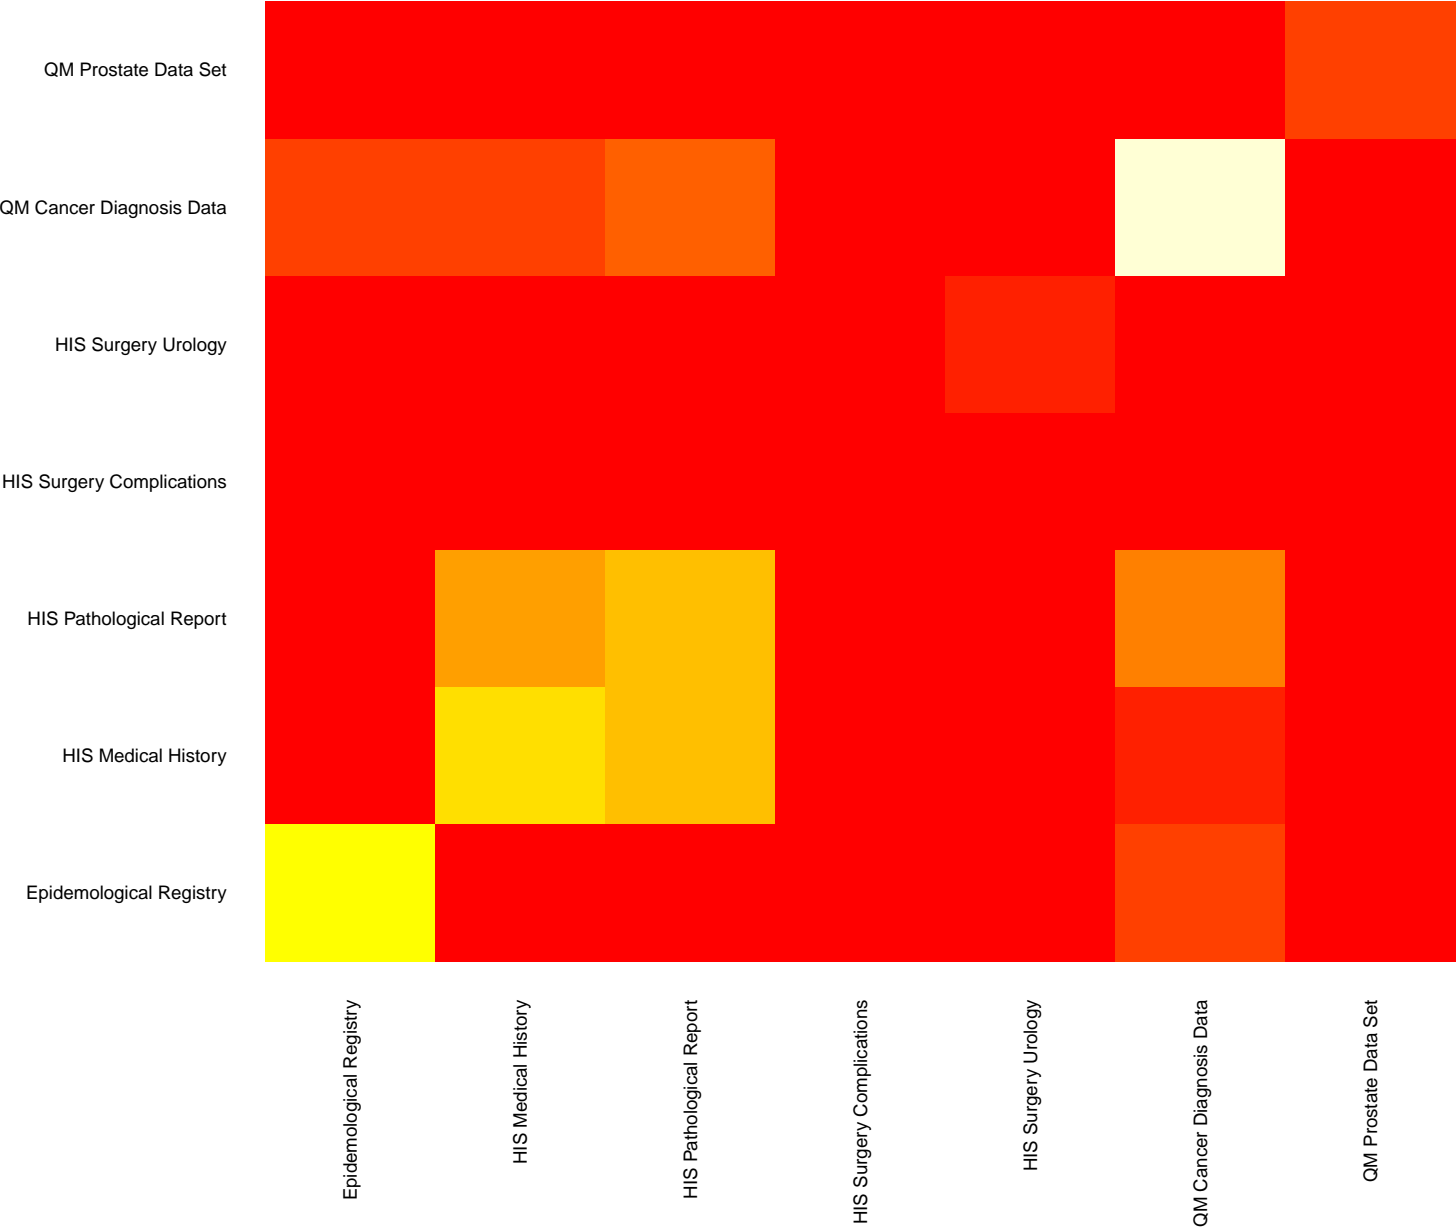

## Matching Items

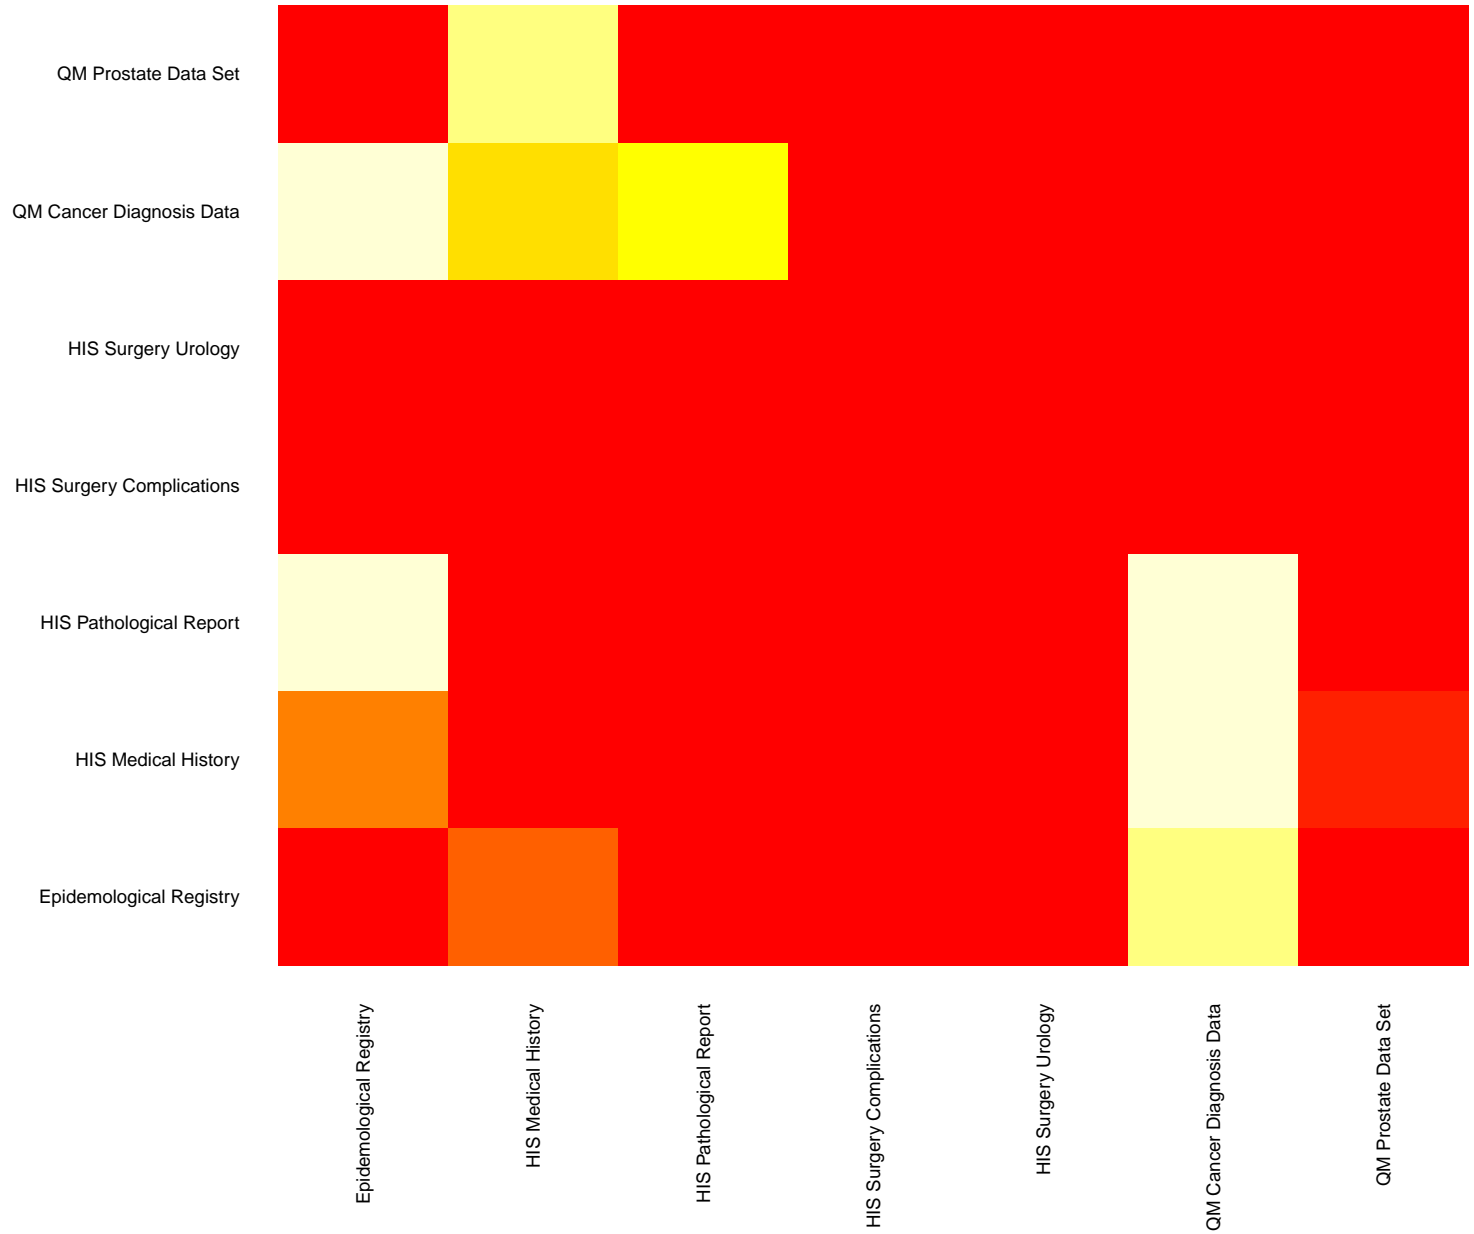

Similar Items

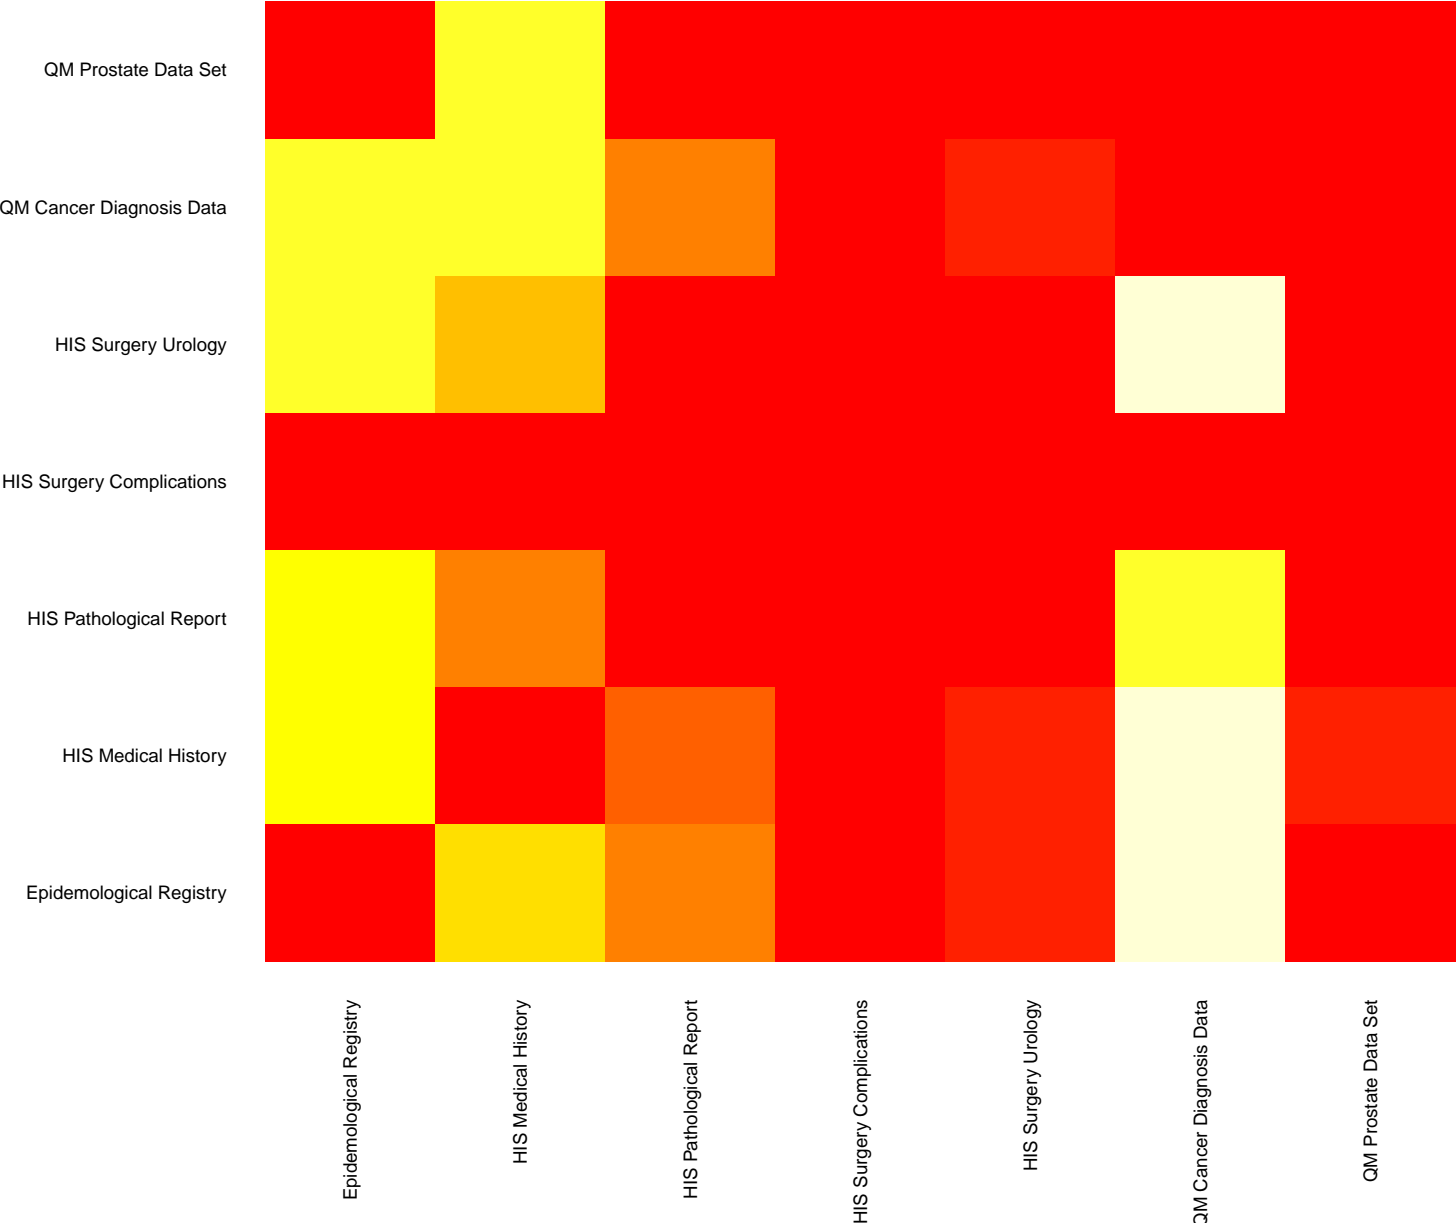

## Identical Items (relative)

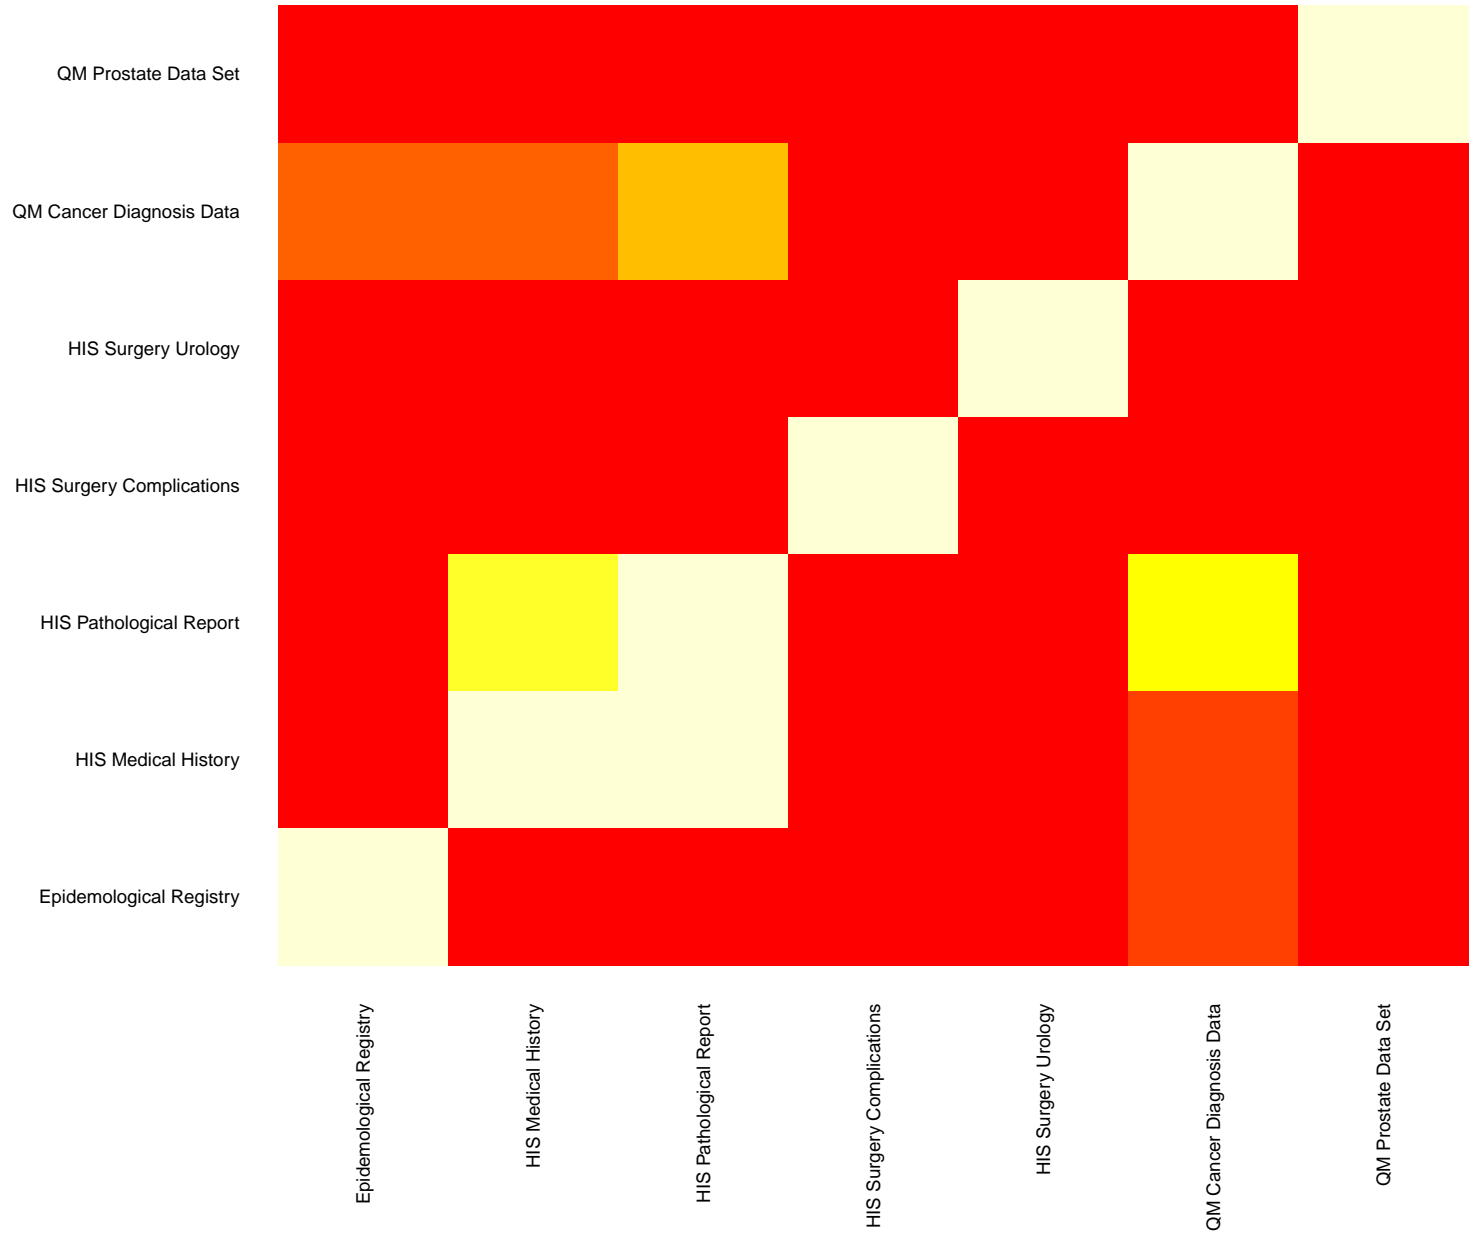

Matching Items (relative)

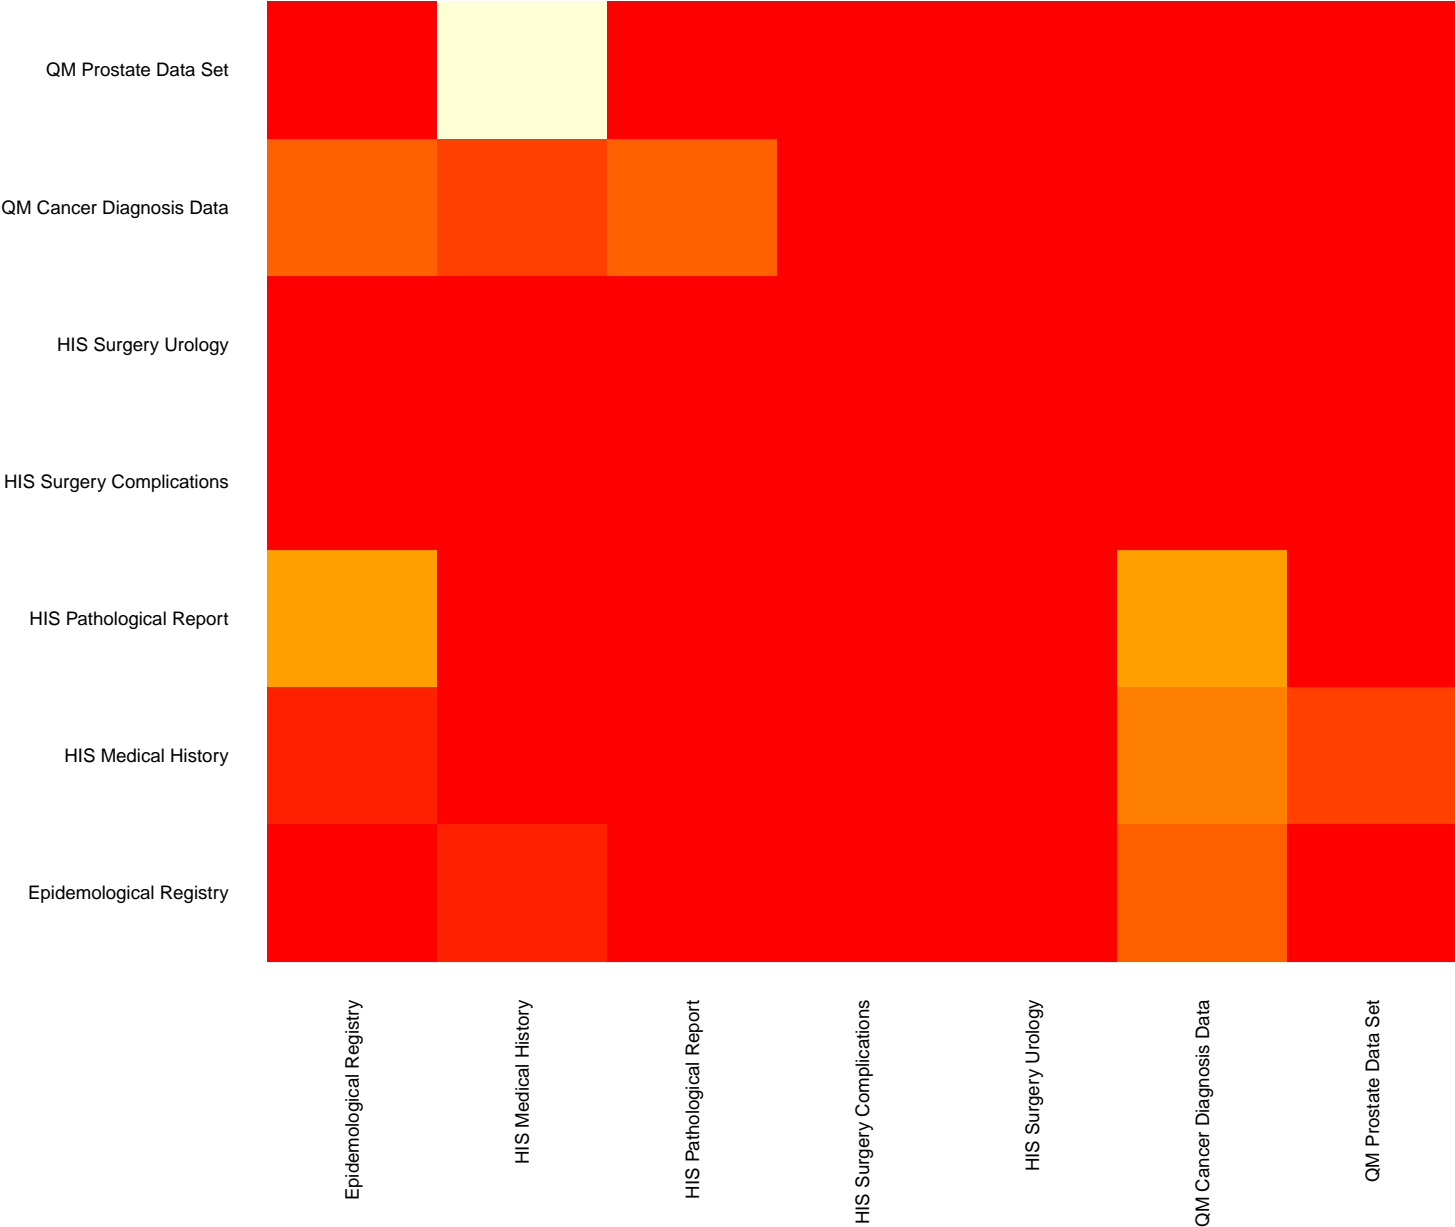

Similar Items (relative)

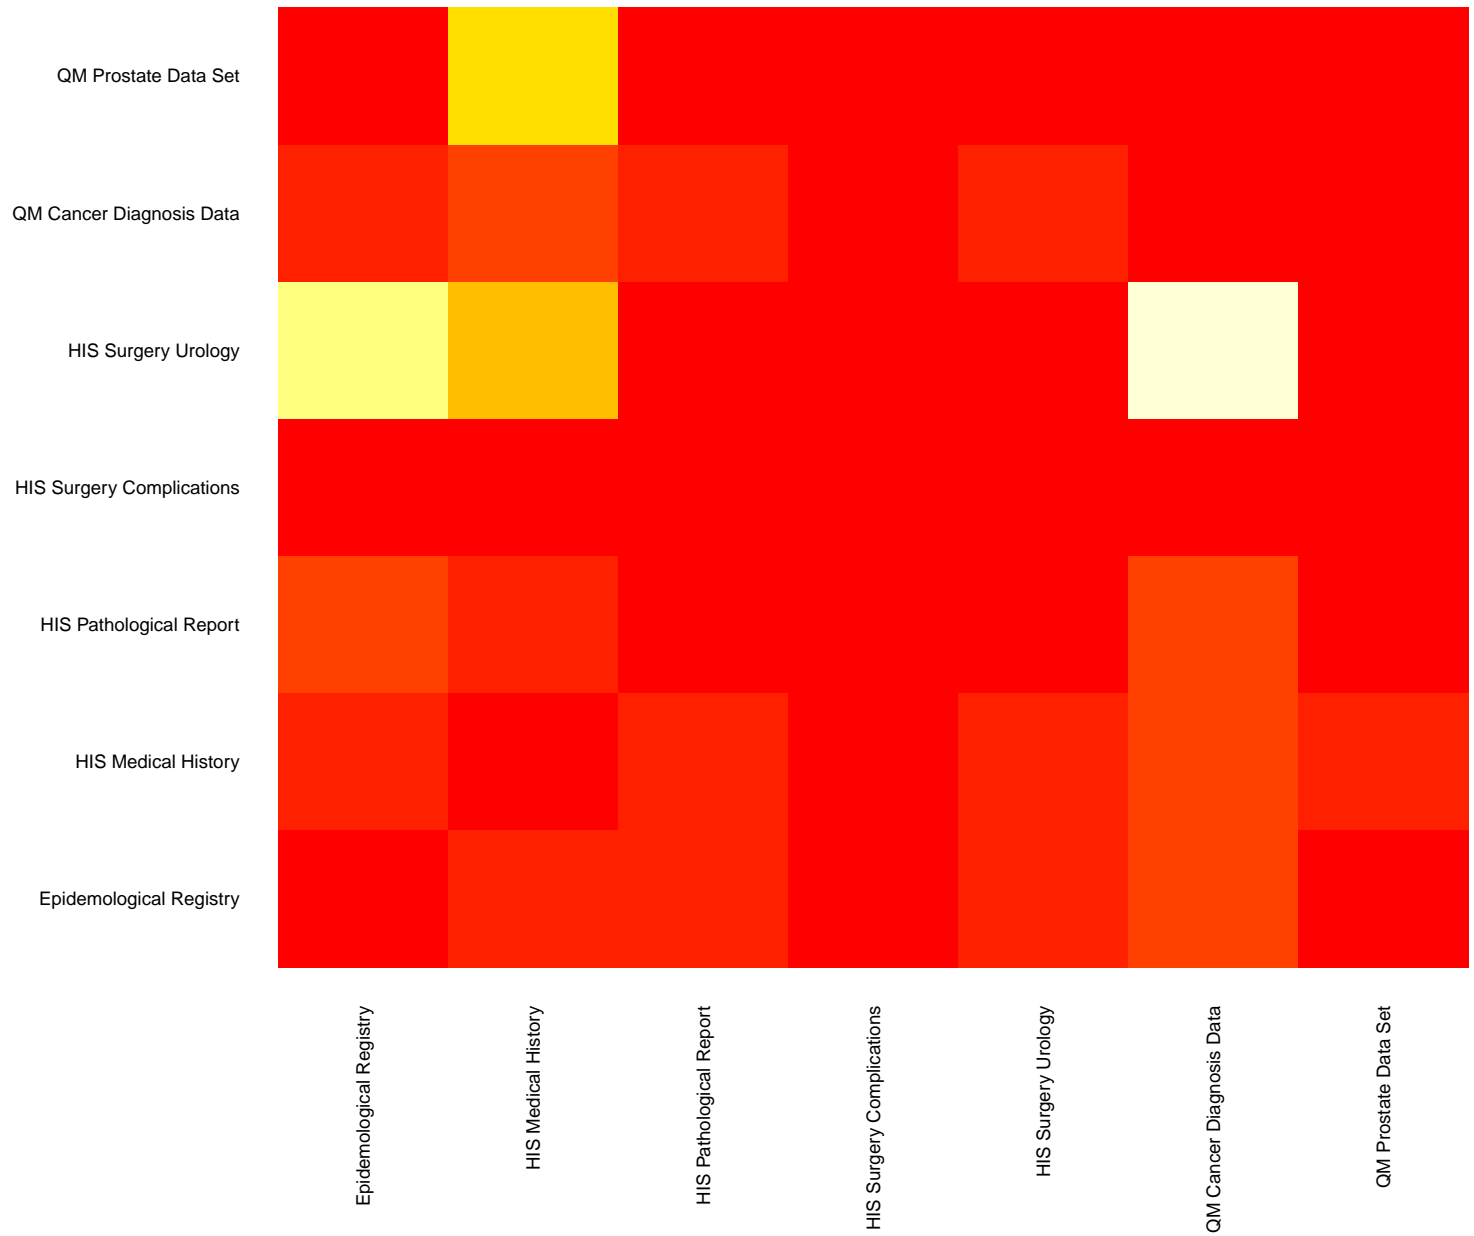

Cluster Dendrogram of Forms

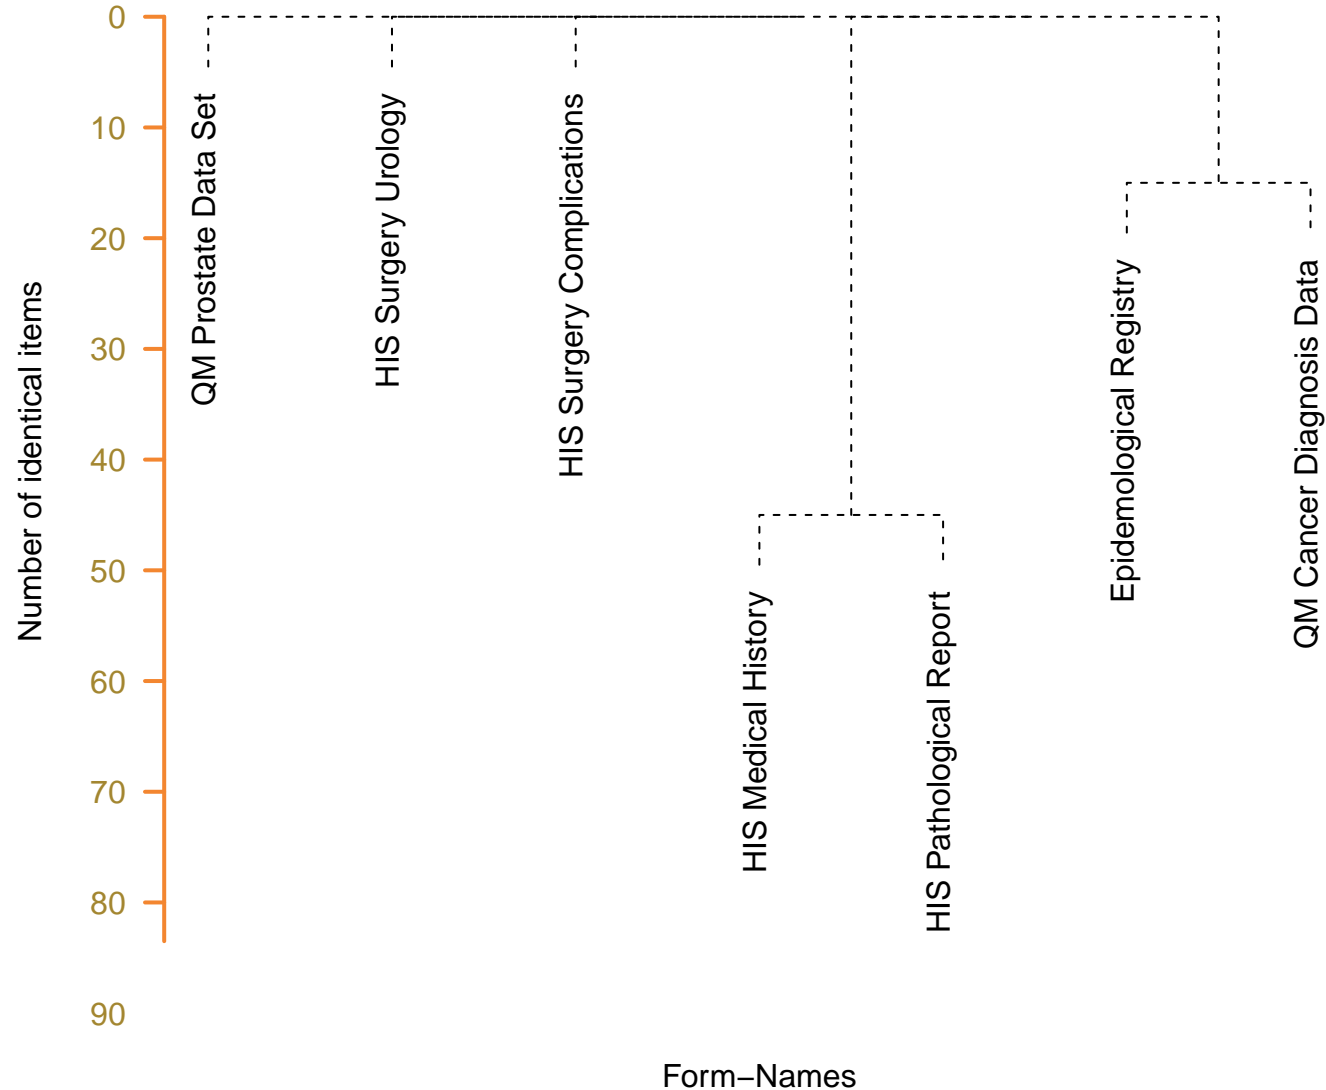



Cluster Dendrogram of Forms

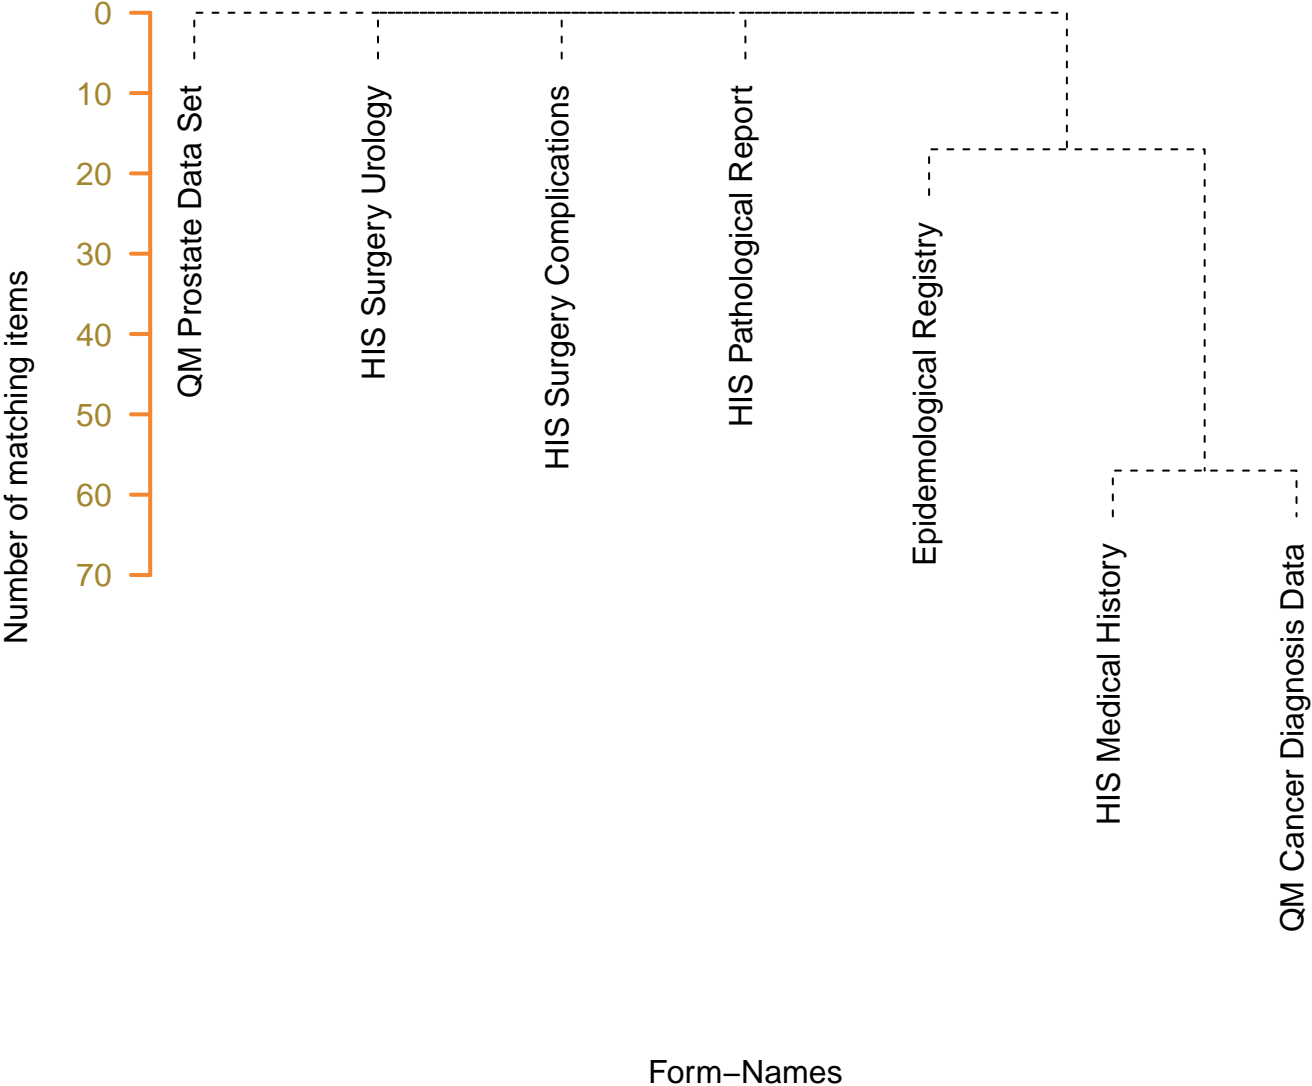

Cluster Dendrogram of Forms

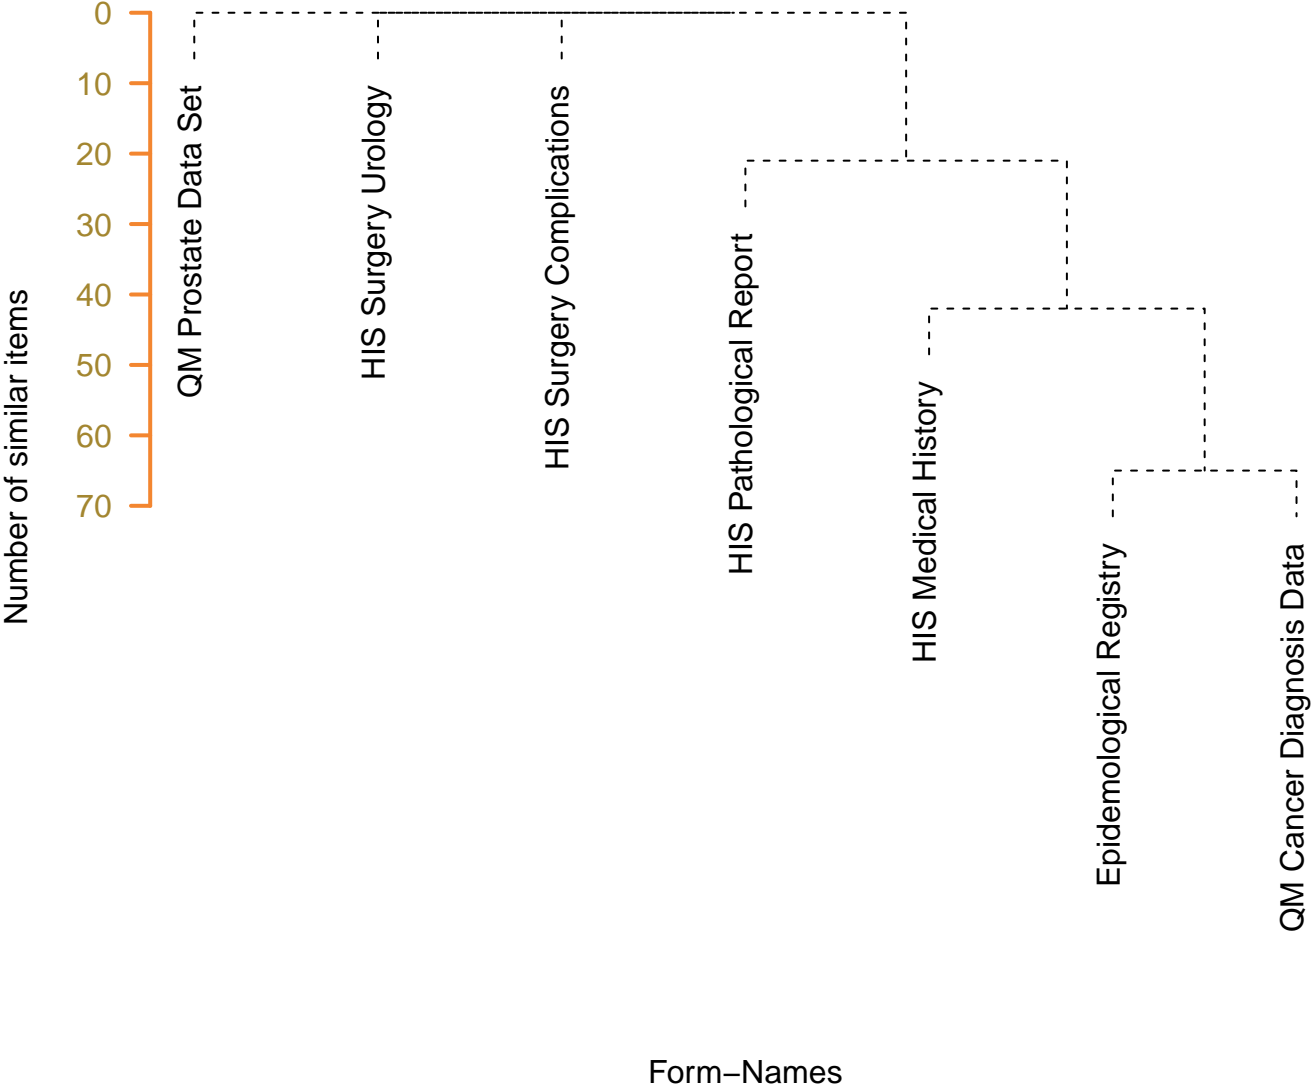

Supplement: S1 (10.1371/journal.pone.0067883.s001) [file journal.pone.0067883.s001]
